# Supplementary material for: Whole genome de novo assemblies of three divergent strains of rice, Oryza sativa, document novel gene space of aus and indica
Source: PubMed Central journal article supplement (PMC4268812; doi:10.1186/s13059-014-0506-z), 2014-12-03
Supplement: 13059_2014_506_MOESM1_ESM.pdf [file 13059_2014_506_MOESM1_ESM.pdf]

# Whole genome de novo assemblies of three divergent strains of rice (*O. sativa*) documents novel gene space of *aus* and *indica*

---

## Supplementary Tables and Figures

### Table of contents

[Supplementary Table 1. Maker input Sequences](#)

[Supplementary Table 2. Gene summary statistics of MAKER-P annotation and comparison to MSU and RAP-DB rice annotations of IRGSP1.0.](#)

[Supplementary Table 3. Alternate Nipponbare assemblies](#)

[Supplementary Table 4a. Nipponbare-specific PCR Validated regions](#)

[Supplementary Table 4b. IR64-specific PCR validated regions](#)

[Supplementary Table 4c. DJ123-specific PCR validated regions](#)

[Supplementary Table 5. Scaffold sizes containing the regions of interest](#)

[Supplementary Table 6. Primers for regions of interest](#)

[Supplementary Table 7. Distance from gene to nearest scaffold gap.](#)

[Supplementary Figure 1. K-mer frequency distributions for the three genomes.](#)

[Supplementary Figure 2. K-mer coverage of the S5 locus.](#)

[Supplementary Figure 3. Multiple alignment of S5 Hybrid Sterility Locus: Indel Region](#)

[Supplementary Figure 4. Multiple alignment of S5 Hybrid Sterility Locus: SNP region](#)

[Supplementary Figure 5. K-mer coverage across the Sub1B gene.](#)

[Supplementary Figure 6. K-mer coverage across the Sub1C gene.](#)

[Supplementary Figure 7. K-mer coverage across the entire LRK region.](#)

[Supplementary Figure 8. K-mer coverage across the LRK1 gene](#)

[Supplementary Figure 9. K-mer coverage across the Pstol1 gene](#)

[Supplementary Figure 10. K-mer coverage across the entire Pup1 region in Kasalath](#)

[Supplementary Figure 11. Multiple alignment of Pstol1 sequence fragment.](#)

## Supplementary Table 1. Maker input Sequences

Sequence evidence used for protein-coding gene annotation by MAKER-P

| <b>Evidence</b>                                                                        | <b>Sequence Count</b> |
|----------------------------------------------------------------------------------------|-----------------------|
| Oryza EST (NCBI)                                                                       | 1,319,326             |
| Oryza FL_CDNA & mRNA (NCBI)                                                            | 61,203                |
| Nipponbare annotated CDS (non-redundant IRGSP-1.0 + MSU7.0: Kawahara et al. 2013)      | 73,621                |
| 93-11 annotated CDS (Gao et al. 2013)                                                  | 37,573                |
| PA64s annotated CDS (Gao et al. 2013)                                                  | 34,690                |
| Nipponbare annotated proteins, non-redundant IRGSP-1.0 + MSU7.0 (Kawahara et al. 2013) | 67,725                |
| 93-11 annotated proteins (Gao et al. 2013)                                             | 37,573                |
| PA64s annotated proteins (Gao et al. 2013)                                             | 34,690                |

**Supplementary Table 2. Gene summary statistics of MAKER-P annotation and comparison to MSU and RAP-DB rice annotations of IRGSP1.0.**

| <b>Assembler / Parameters</b>                                                      | <b>DJ123 MAKER</b> | <b>IR64 MAKER</b> | <b>Nipponbare MAKER</b> | <b>IRGSP1.0 MSU</b> | <b>IRGSP1.0 RAP-DB</b> |
|------------------------------------------------------------------------------------|--------------------|-------------------|-------------------------|---------------------|------------------------|
| Gene count (protein-coding)                                                        | 37812              | 37758             | 39083                   | 39049               | 35472                  |
| Median gene length (nt)                                                            | 2285               | 2275              | 2224                    | 2188                | 2458                   |
| Average transcripts/gene                                                           | 1.36               | 1.35              | 1.34                    | 1.26                | 1.18                   |
| Median coding length (nt)*                                                         | 873                | 873               | 846                     | 849                 | 803                    |
| Median peptide length (aa)*                                                        | 291                | 291               | 282                     | 283                 | 268                    |
| Median exon length (nt)*                                                           | 157                | 158               | 157                     | 165                 | 177                    |
| Median intron length (nt)*                                                         | 185                | 186               | 188                     | 174                 | 155                    |
| Average exons/transcript*                                                          | 4.9                | 4.8               | 4.8                     | 4.3                 | 4.4                    |
| Percent genes single-exon                                                          | 20.7               | 20.6              | 20.7                    | 24.9                | 28.8                   |
| *Based on single representative transcript per gene having longest coding sequence |                    |                   |                         |                     |                        |

### Supplementary Table 3. Alternate Nipponbare assemblies

Note, the SOAPdenovo assemblies used Quake to error correct the reads before assembly (indicated with a \*), while ALLPATHS-LG and SGA have integrated error correction packages so used the raw reads directly.

| Assembler / Parameters | Libraries                                   | Span (Mbp)<br>Bases (Mbp) | Scaffold N50 (kbp) | Contig N50 (kbp) |
|------------------------|---------------------------------------------|---------------------------|--------------------|------------------|
| <b>ALLPATHS-LG</b>     |                                             |                           |                    |                  |
| + MIN_CONTIG=300       | 180bp frag<br>2.1kbp jump<br>4.8kbp jump    | 355.6<br>322.5            | 213.7              | 21.5             |
| + MIN_CONTIG=300       | 180bp frag<br>1.8kbp jump<br>2.1kbp jump    | 357.6<br>317.2            | 98.7               | 20.8             |
| <b>SOAPdenovo</b>      |                                             |                           |                    |                  |
| + K=33                 | 180bp frag*<br>2.1kbp jump*<br>4.8kbp jump* | 364.9<br>263.3            | 5.5                | 0.6              |
| + K=35                 | “                                           | 368.7<br>272.8            | 5.9                | 0.8              |
| + K=37                 | “                                           | 366.3<br>281.9            | 6.2                | 1.0              |
| + K=39                 | “                                           | 368.1<br>289.7            | 6.6                | 1.2              |
| + K=41                 | “                                           | 368.7<br>296.4            | 7.0                | 1.4              |
| + K=43                 | “                                           | 359.1<br>302.7            | 5.6                | 1.7              |
| + K=45                 | “                                           | 359.8<br>307.5            | 5.7                | 1.9              |

| <b>Assembler<br/>/ Parameters</b> | <b>Libraries</b>                         | <b>Span (Mbp)<br/>Bases (Mbp)</b> | <b>Scaffold N50<br/>(kbp)</b> | <b>Contig N50<br/>(kbp)</b> |
|-----------------------------------|------------------------------------------|-----------------------------------|-------------------------------|-----------------------------|
| <b>SGA</b>                        |                                          |                                   |                               |                             |
| + K=71                            | 180bp frag<br>2.1kbp jump<br>4.8kbp jump | 380.3<br>512.1                    | 13.6                          | 1.2                         |
| + K=73                            | “                                        | 379.3<br>498.4                    | 13.8                          | 1.5                         |
| + K=75                            | “                                        | 378.3<br>485.5                    | 13.9                          | 1.7                         |
| + K=77                            | “                                        | 376.7<br>472.9                    | 13.9                          | 2.0                         |

**Supplementary Table 4a. Nipponbare-specific PCR Validated regions**

Note the ordering and gene status has slightly changed since the analysis was finalized for publication.

| #  | Scaffold / Coordinates          | Forward Primer / Reverse Primer                | Notes                        |
|----|---------------------------------|------------------------------------------------|------------------------------|
| 1  | scaffold_45<br>198303 - 211765  | AACATAGCGGGGAAGGCCTT<br>GACGCCAGTCTAGGTCCCAC   |                              |
| 2  | scaffold_450<br>64623 - 76993   | TGTCCTCCACGTGCCTGTTC<br>TTCACAAGTGGACCGCTCGT   |                              |
| 3  | scaffold_849<br>41087 - 53325   | TACGCCGCCGTCAATACCAG<br>TGGACGAGAGGAAGAGGGGT   |                              |
| 4  | scaffold_139<br>54757 - 66719   | GGCACCTCGCATCTCAAGGT<br>CGGGCACAATTCCGACTACAC  |                              |
| 5  | scaffold_37<br>99481 - 111372   | TTGGGCCGTAAGCTTGAACC<br>CATCATGTGCCTTGTGTACGTG |                              |
| 6  | scaffold_995<br>40472 - 51224   | TCTCGCTGGACGGTCTCTGA<br>ACCTTCCCTTGTTGATGCCCT  | Currently 8th longest        |
| 7  | scaffold_18<br>671704 - 681347  | GTGCCACACTTGCTGATGGC<br>ACCATCAGTTTGTTCGGCCC   | Currently 9th longest        |
| 8  | scaffold_290<br>184750 - 192614 | GGAACGCTGAGGCACACAAG<br>GACGTTGTTGCCAGGCTCAG   | No longer intersects an exon |
| 9  | scaffold_77<br>448149 - 458404  | CTGAACCACATGACCGCTGC<br>GATCGTCGGCTTGTCGGAGA   | Currently 10th longest       |
| 10 | scaffold_2377<br>14202 - 21834  | TTTTTCCGCCGGCCAAAACG<br>TGGGCCGGAGTAAAACAATCA  | Currently 11th longest       |

**Supplementary Table 4b. IR64-specific PCR validated regions**

Note the ordering and gene status has slightly changed since the analysis was finalized for publication.

| #  | Scaffold / Coordinates          | Forward Primer / Reverse Primer                | Notes                  |
|----|---------------------------------|------------------------------------------------|------------------------|
| 1  | scaffold_918<br>12095 - 27494   | GGCATTAGCACAGGCAGCAG<br>CAATTGAAAGGCCACTCACCT  |                        |
| 2  | scaffold_712<br>115731 - 129191 | AGTATTCAGCTCTGTGGCAGCA<br>TGGATCGACACAGCTCCGTG |                        |
| 3  | scaffold_1091<br>78493 - 90663  | GGTGCGTGTTGGATGATGCT<br>ACTGATTGGACAAGGGCGGC   |                        |
| 4  | scaffold_408<br>2395 - 14990    | GCGCTTGAGTTGGGATGCTA<br>ACGGCATTAGCAGGGGACAA   |                        |
| 5  | scaffold_299<br>284265 - 296829 | CCCTCCTTTGTGACAGGCCA<br>GCGGCAACAGACTCGTTATCG  |                        |
| 6  | scaffold_479<br>190704 - 202637 | CACGAGTTGCAACTGCCAGT<br>ACATGTGCCGATCCCATGGA   | Currently 7th longest  |
| 7  | scaffold_382<br>149495 - 161037 | ACAGGACGGGACTGTTTCGTC<br>TTGAGCCCTTCATGCACCCT  | Currently 8th longest  |
| 8  | scaffold_1261<br>47601 - 59036  | GCCCATACACCGTCATGGGT<br>GGACAGCGTGGTGTACAGAGA  | Currently 9th longest  |
| 9  | scaffold_201<br>190458 - 201884 | CCATATGCCGGCCAGGATCT<br>TAGTGTGGCACATCGCAACC   | Currently 10th longest |
| 10 | scaffold_977<br>3058 - 14164    | GTTGTCGTCGCATCCGTGTC<br>CCATGGATCAACCCGGTGTG   | Currently 11th longest |

### Supplementary Table 4c. DJ123-specific PCR validated regions

Note the ordering and gene status has slightly changed since the analysis was finalized for publication.

| Num | Scaffold / Coordinates          | Forward Primer / Reverse Primer               | Notes                       |
|-----|---------------------------------|-----------------------------------------------|-----------------------------|
| 1   | scaffold_1266<br>34254 - 47074  | CTGCCACAAGCCTCCCAATT<br>CCCAGGGCTCCTTATGCGAT  | No longer intersects a gene |
| 2   | scaffold_903<br>70491 - 82898   | TCCGCAGCATAGAAGGCC<br>GCCCATAGATGCGCCATCCA    |                             |
| 3   | scaffold_1392<br>10086 - 22243  | ACAGCCACTGCCACATGTGA<br>TGGGCTGATCGATCATGCGA  |                             |
| 4   | scaffold_185<br>381192 - 292627 | AACCGAGCGACTGTAGCCAC<br>TGATGCTCTTGAGGGCGACA  |                             |
| 5   | scaffold_318<br>70856 - 82242   | TTGACCATGGGCAAGACTGG<br>GCTCATTGGACAAGGCGGTT  |                             |
| 6   | scaffold_289<br>28477 - 49393   | TATCAGCGTCGACCTGGTGG<br>ACAAGCTGCCTCACCGATGT  | Currently 7th longest       |
| 7   | scaffold_328<br>55971 - 66840   | TGGGCCCAATCAGATGCCAT<br>GAGCGACCCCTTAGGCCTTC  | Currently 8th longest       |
| 8   | scaffold_92<br>124892 - 135721  | TGACGGAGCTGCTGAAGGAG<br>TTGACAAGGCAGCGACGGAT  | Currently 9th longest       |
| 9   | scaffold_82<br>177274 - 187967  | TGGACATTGTGGTGCAGCCA<br>ACCTGCTCCAAACCAGTCGA  | Currently 10th longest      |
| 10  | scaffold_132<br>88873 - 99280   | CCACCCACCACTCGCACTAG<br>AAGCAACACGGTGTTCGGAGA | Currently 11th longest      |



**Supplementary Table 5. Scaffold sizes containing the regions of interest**

| <b>Region</b>      | <b>Nipponbare</b> | <b>IR64</b> | <b>DJ123</b> |
|--------------------|-------------------|-------------|--------------|
| <b><i>S5</i></b>   | 279.2 Kb          | 542.2 Kb    | 499.5 Kb     |
| <b><i>Sub1</i></b> | 49.6 Kb           | 520 Kb      | 299.5 Kb     |
| <b><i>LRK</i></b>  | 96.4 Kb           | 210.2 Kb    | 299 Kb       |
| <b><i>Pup1</i></b> | 50.5 Kb           | 217.8 Kb    | 114.8 Kb     |
|                    | 36.5 Kb           |             | 69.2 Kb      |

**Supplementary Table 6. Primers for regions of interest**

**Primers for Sanger sequencing to confirm polymorphisms in S5 region**

|         |                      |
|---------|----------------------|
| S5-Fwd1 | TGCCCCTGAGCAAGCAAGAA |
| S5-Fwd2 | CCTACGTTTGACTGCCTGCC |
| S5-Fwd3 | GTTCGGGTGCAGCATGGATG |
| S5-Rev1 | ACTACTACACGCGGCTTCGG |
| S5-Rev2 | TGGCGCCTTGAGAGTTCACA |
| S5-Rev3 | GTGTAGCGCGGGAGAAGACT |

**Primers for Sanger sequencing validation of *Pstol1* SNPs**

|            |                      |
|------------|----------------------|
| Pstol-Fwd1 | ATGGCCGTGAGATAGCCGTC |
| Pstol-Rev1 | AAGCCCTTTTGGTGGCAACG |

**Supplementary Table 7. Distance from gene to nearest scaffold gap.**

For each annotated gene in the 3 assemblies, we computed the distance to the nearest scaffold gap or to the end of scaffold from the 5' and 3' ends of each gene. We observe the strain-specific genes to be modestly closer to scaffold gaps than genes shared in all three strains: median of 12-14kbp for shared vs 8-10kbp for strain-specific. Across all sets less than 12% of the genes have less than 1000bp of flanking sequence. In a minority of cases the gene model would span across a scaffold gap, giving a zero or negative flanking distance.

| <i>Analysis Set</i>            | <i>Gene count</i> | <i>Median 5' flank length</i> | <i>Median 3' flank length</i> | <i>Num. Genes &lt;1000bp 5' flank (%)</i> | <i>Num. Genes &lt;1000bp 3' flank (%)</i> |
|--------------------------------|-------------------|-------------------------------|-------------------------------|-------------------------------------------|-------------------------------------------|
| <i>IR64/ Nipponbare/ DJ123</i> | 109,865           | 12,947                        | 14,059                        | 7,896 (7.2)                               | 6,585 (6.0)                               |
| <i>IR64/ DJ123</i>             | 1,209             | 8,451                         | 8,976                         | 114 (9.4)                                 | 97 (8.0)                                  |
| <i>DJ123/ Nipponbare</i>       | 1,156             | 8,425                         | 9,086                         | 108 (9.3)                                 | 98 (8.5)                                  |
| <i>IR64/ Nipponbare</i>        | 959               | 6,858                         | 7,826                         | 124 (12.9)                                | 101 (10.5)                                |
| <i>IR64</i>                    | 381               | 9,112                         | 8,049                         | 36 (9.4)                                  | 42 (11.0)                                 |
| <i>DJ123</i>                   | 297               | 9,911                         | 9,808                         | 24 (8.1)                                  | 21 (7.1)                                  |
| <i>Nipponbare</i>              | 786               | 8,980                         | 9,023                         | 94 (12.0)                                 | 74 (9.4)                                  |

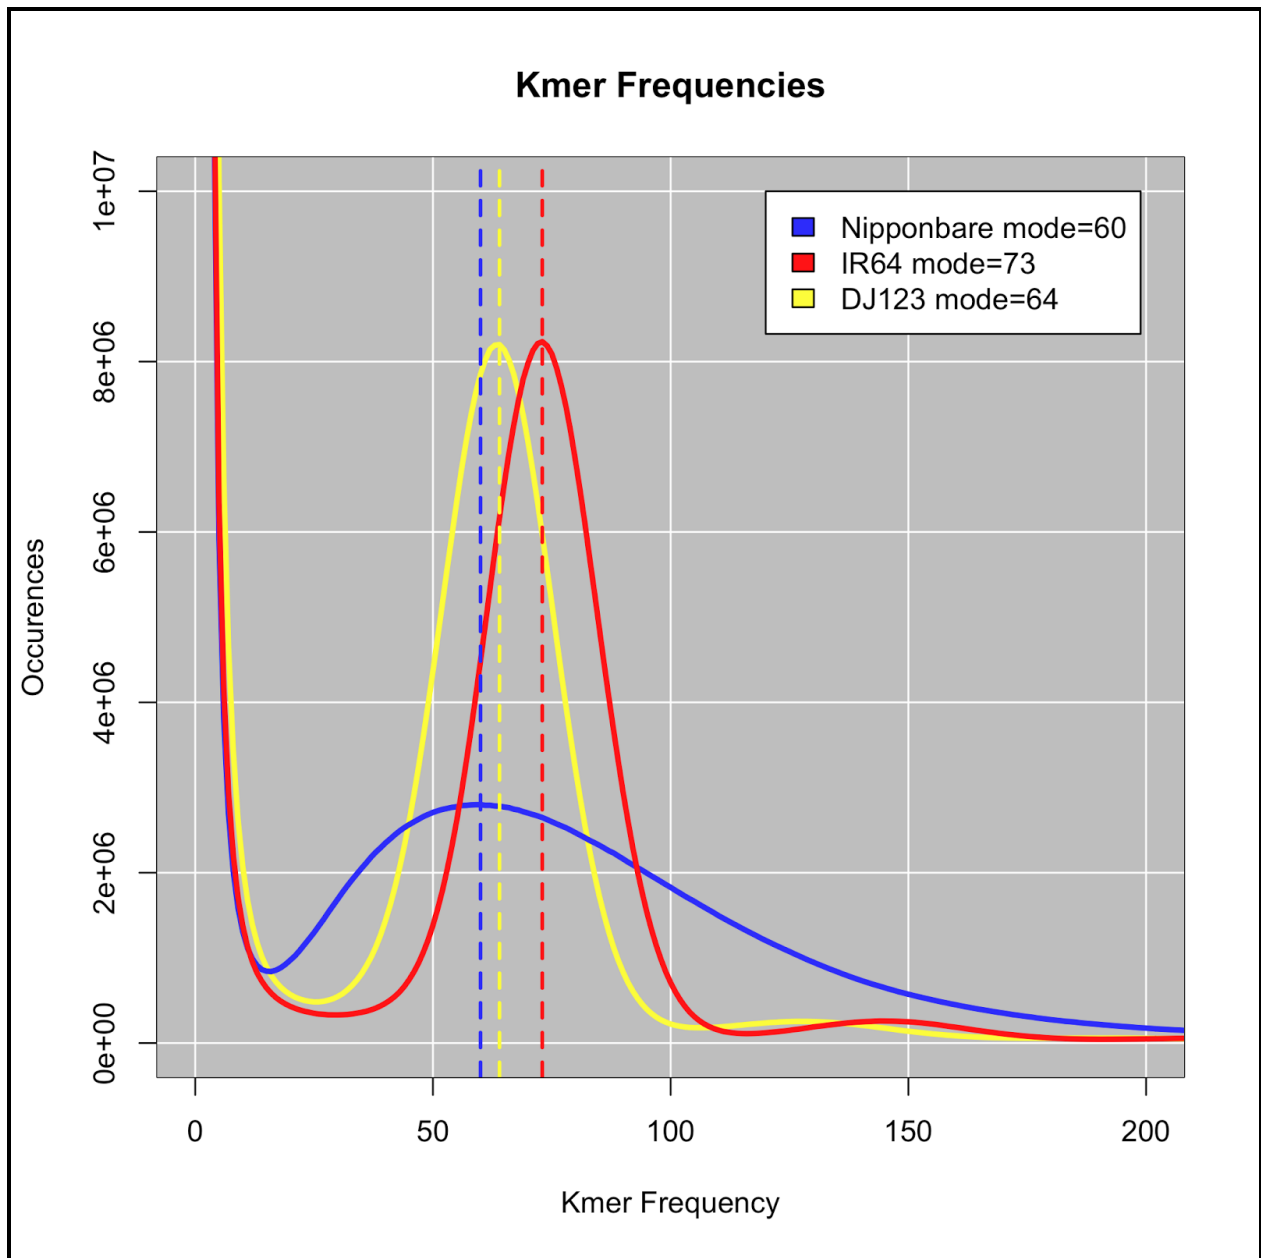

**Supplementary Figure 1. K-mer frequency distributions for the three genomes.**

The mode values of the distributions are highlighted as dashed vertical lines. DJ123 and IR64 have well resolved peaks from centered at their average coverage levels, Nipponbare has a broad peak because the library had the greatest proportion of duplicate reads.

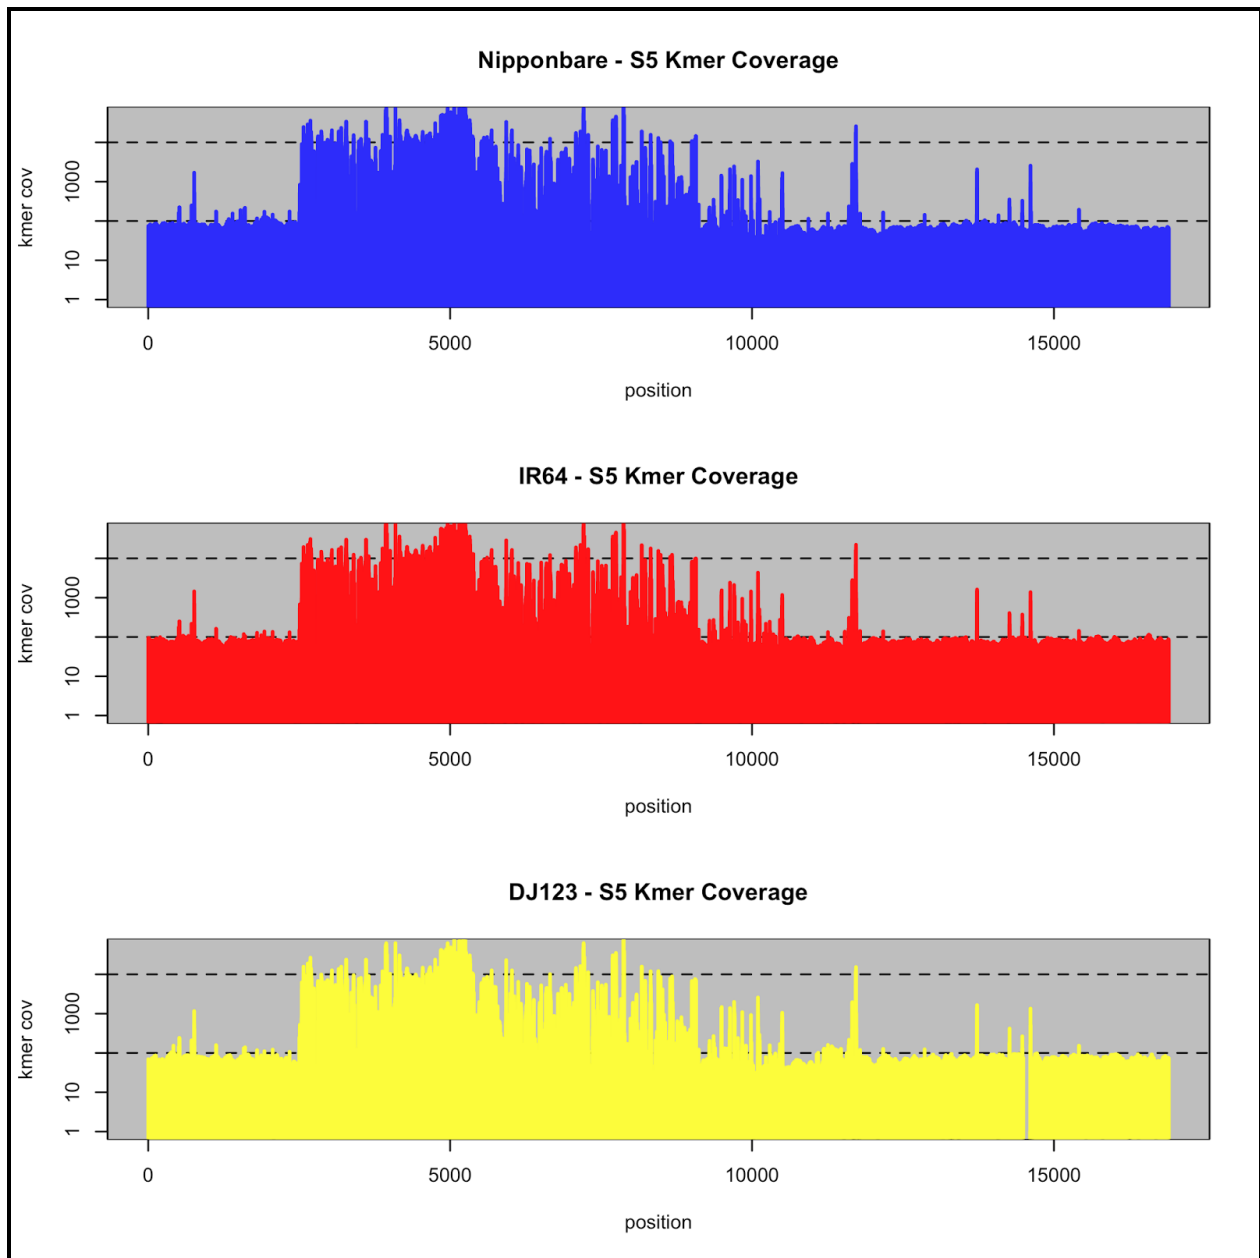

**Supplementary Figure 2. K-mer coverage of the *S5* locus.**

These plots display the k-mer coverage from the start of the CDS of ORF3 to the end of ORF5 of the Nipponbare reference sequence (NC\_008399.2: 5744179-5761023). For clarity, 1x to 50,000x range (log scale) has been displayed in all the plots.

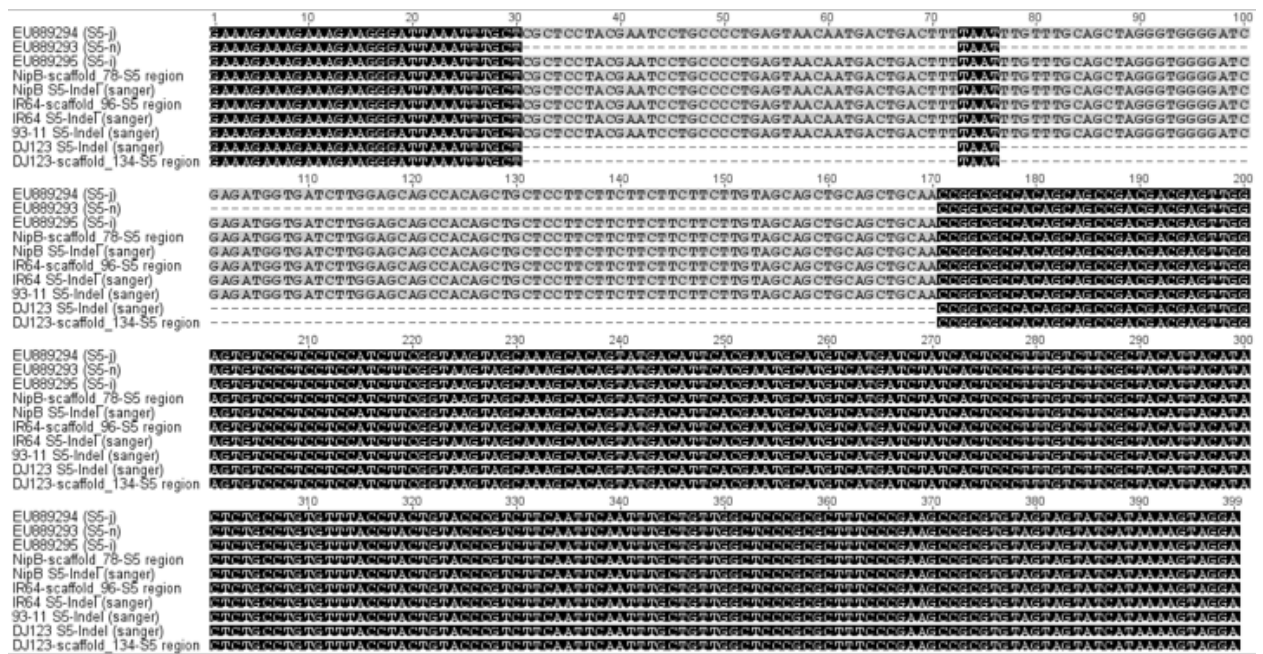

Supplementary Figure 3. Multiple alignment of *S5* Hybrid Sterility Locus: Indel Region

In particular, the indel predicted by the DJ123 scaffold was confirmed by Sanger sequencing.

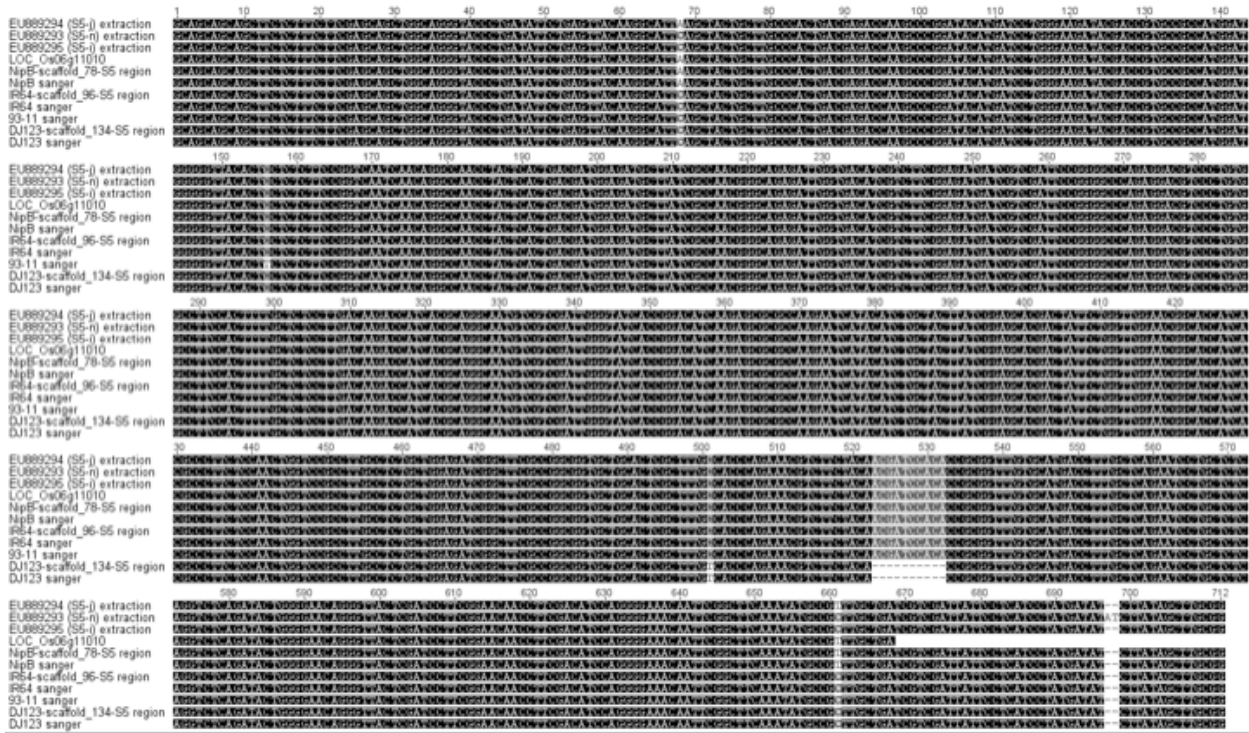

**Supplementary Figure 4. Multiple alignment of *S5* Hybrid Sterility Locus: SNP region**

In particular, the DJ123 scaffold shows a novel haplotype confirmed with Sanger sequencing.

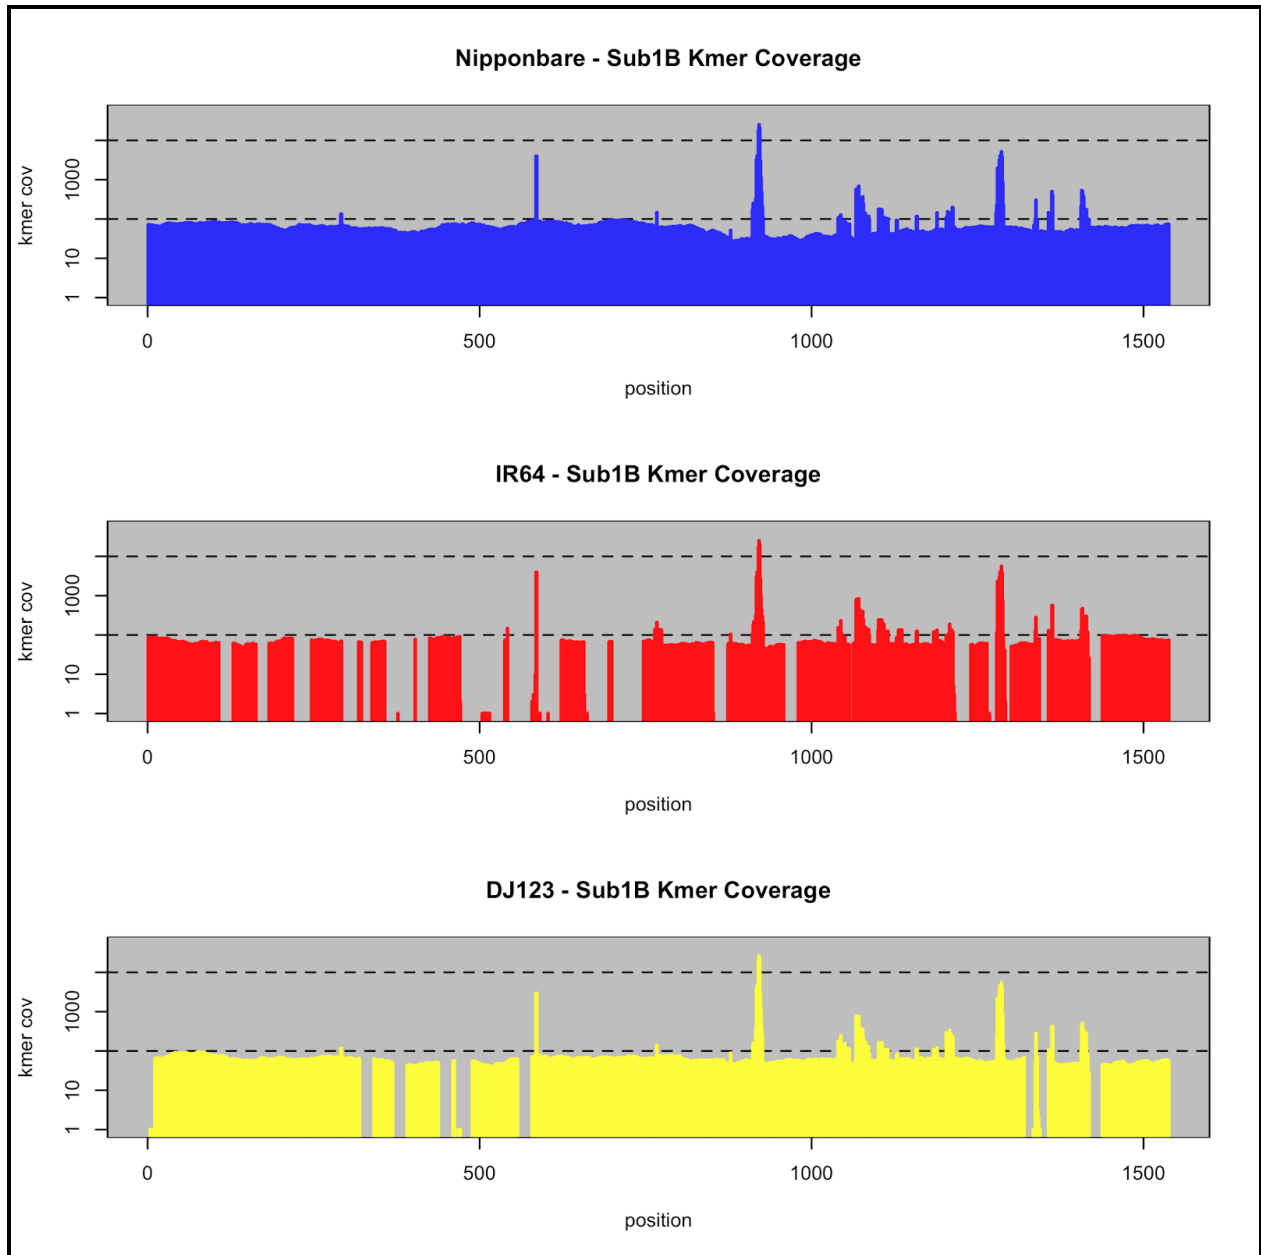

**Supplementary Figure 5. K-mer coverage across the *Sub1B* gene.**

For clarity, the range 1x to 50,000x (log scale) is displayed in all the plots.



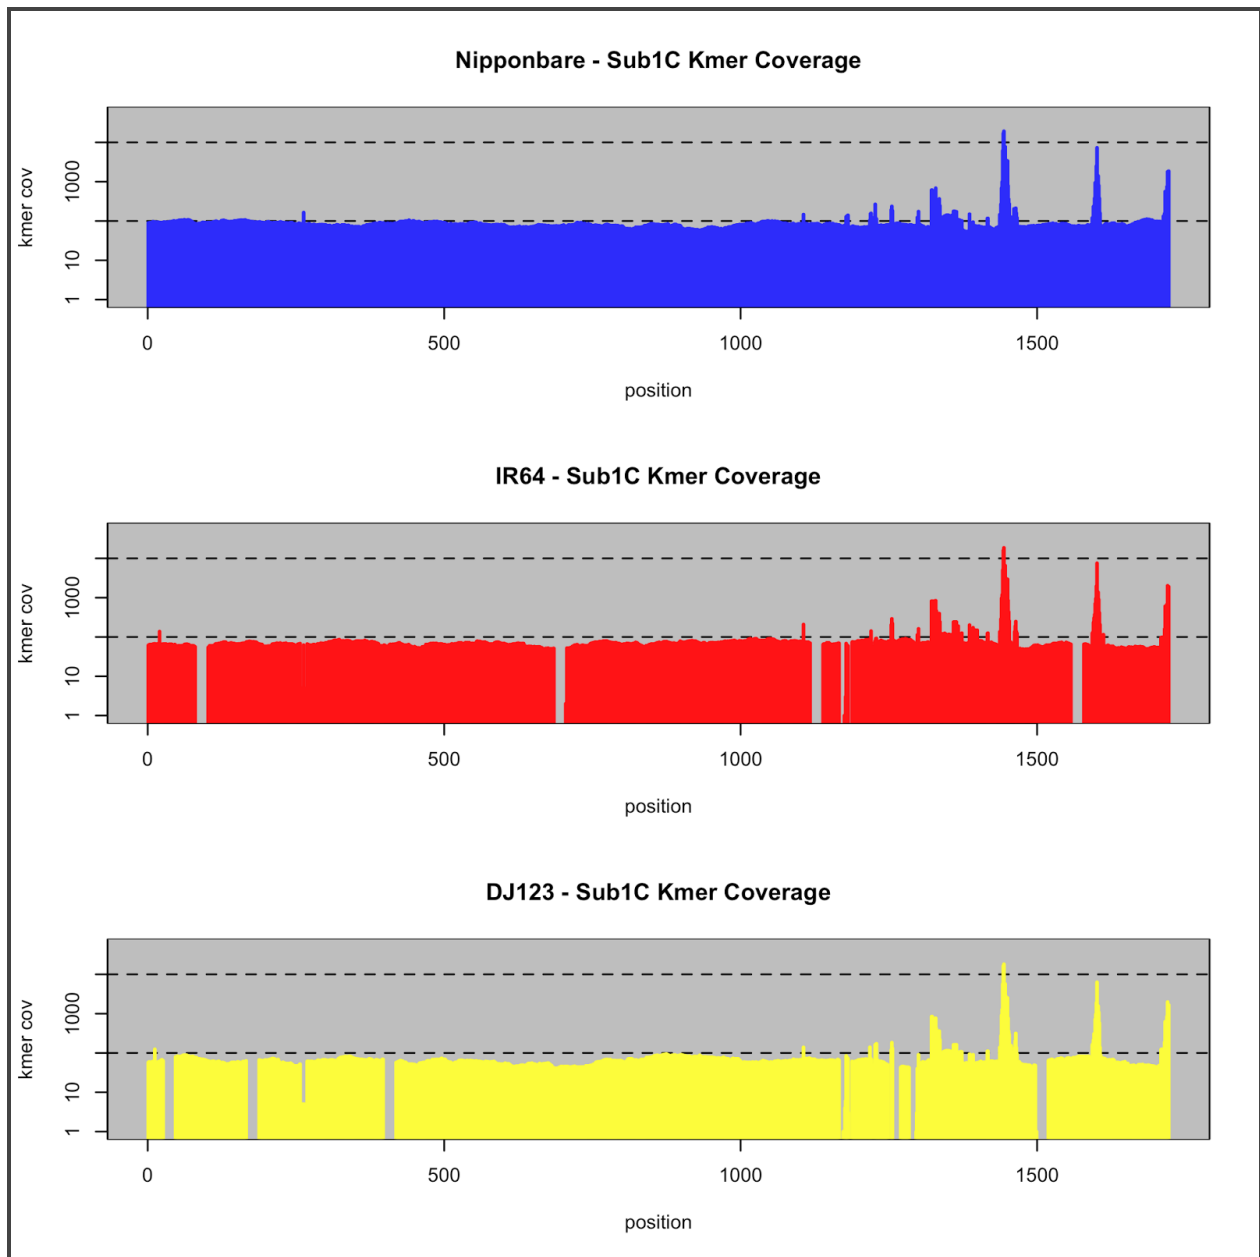

**Supplementary Figure 6. K-mer coverage across the *Sub1C* gene.**

For clarity, the range 1x to 50,000x (log scale) is displayed in all the plots.

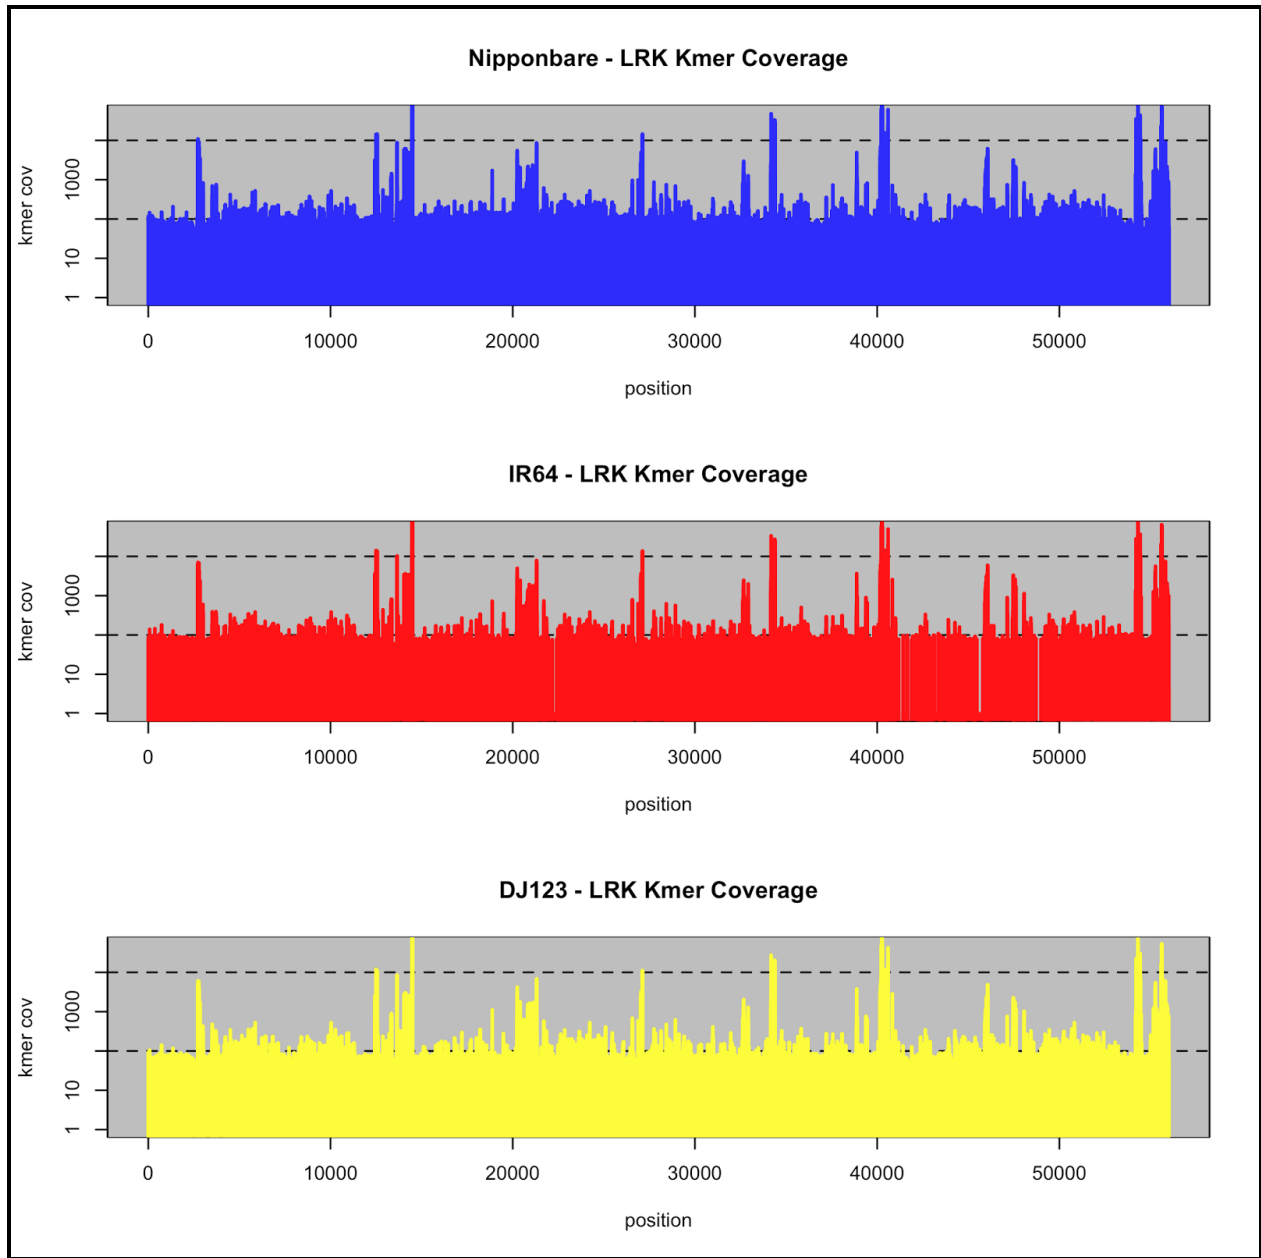

**Supplementary Figure 7. K-mer coverage across the entire *LRK* region.**

These plots display the k-mer coverage across the locus defined by the Nipponbare reference sequence (chr2:2930001-2986002). For clarity, the range 1x to 50,000x (log scale) is displayed in all the plots.

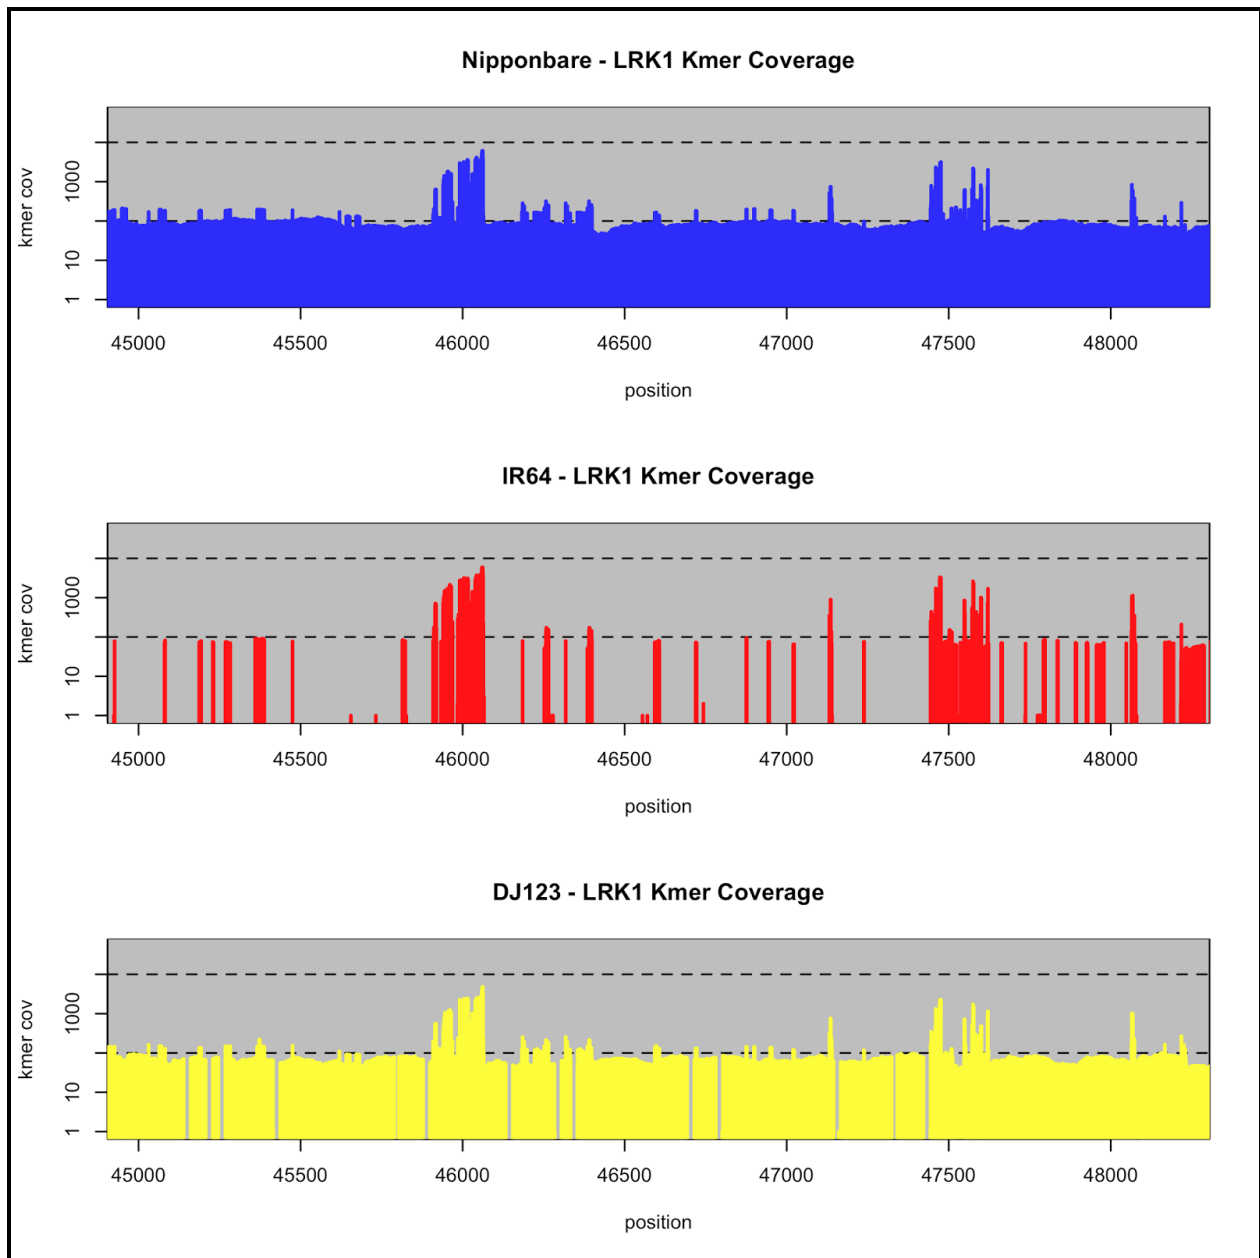

### Supplementary Figure 8. K-mer coverage across the LRK1 gene

These plots display the k-mer coverage across the locus defined by the Nipponbare reference sequence (chr2:2930001-2986002) focusing on the interval for LRK1 (45030-48179 of this region). For clarity, the range 1x to 50,000x (log scale) is displayed in all the plots. Nipponbare and DJ123 have nearly uniform coverage across the gene except for SNPs in DJ123 shown as abrupt drops in coverage. The sparse coverage in IR64 indicates the presence of isolated k-mers and repeats shared with the other genomes, but an overall absence of the gene.

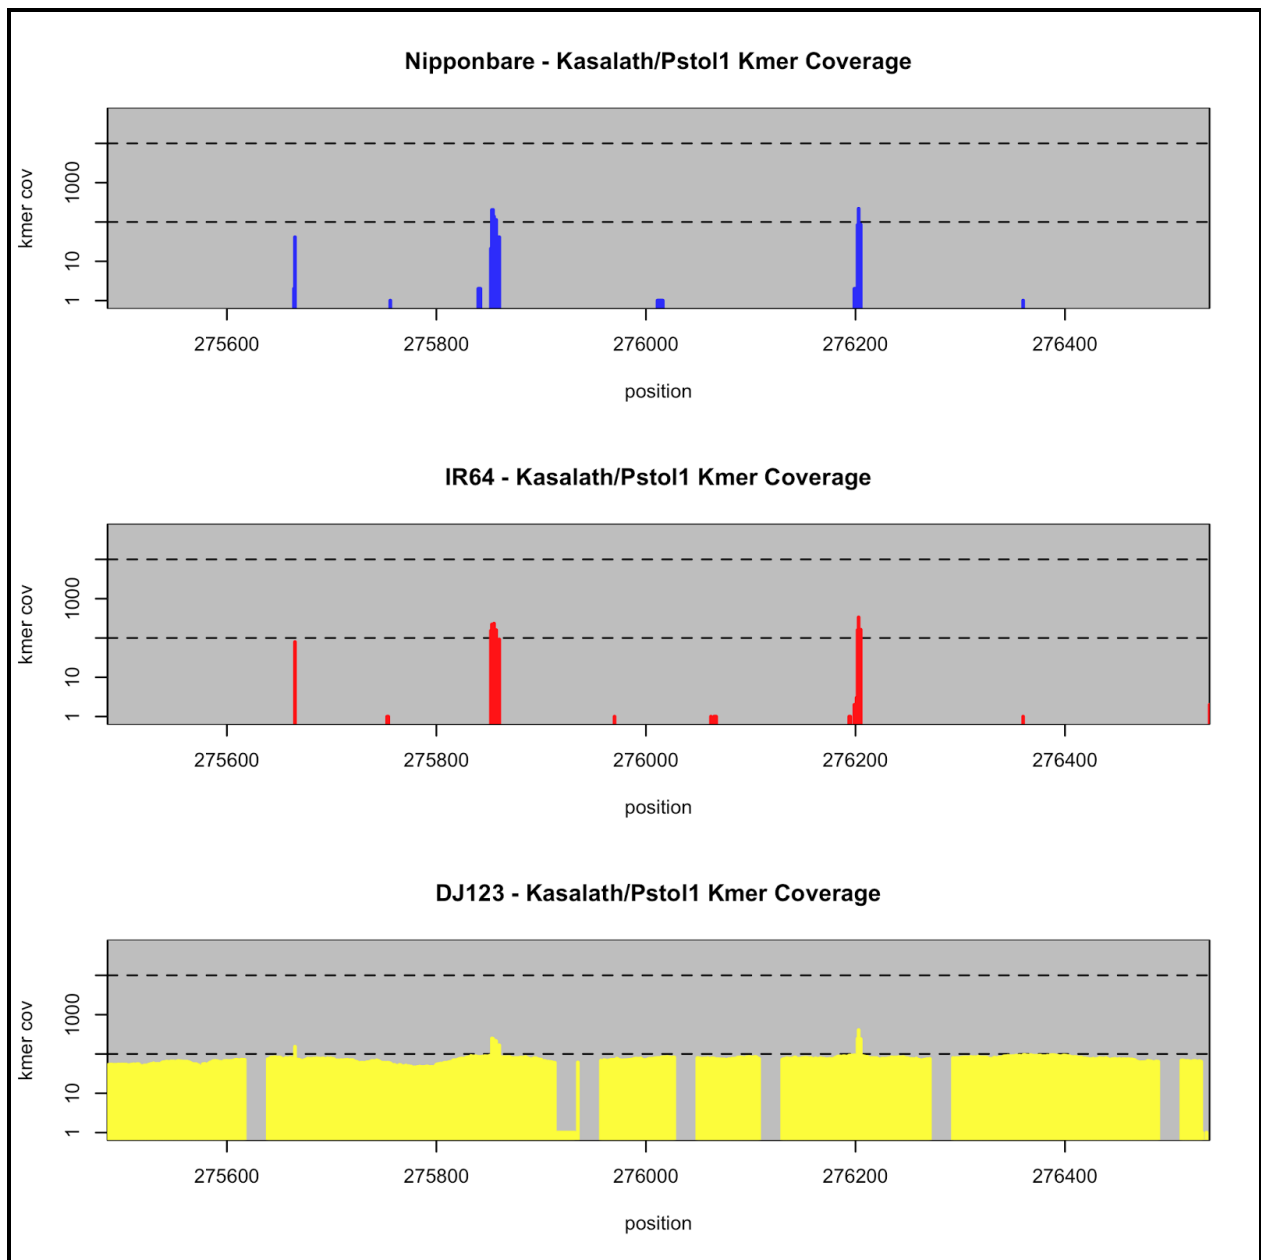

**Supplementary Figure 9. K-mer coverage across the *Pstol1* gene**

The k-mer coverage is plotted with respect to the reference Kasalath sequence (AB458444.1) across the *Pstol1* gene. For clarity, the range 1x to 50,000x (log scale) is displayed in all the plots.

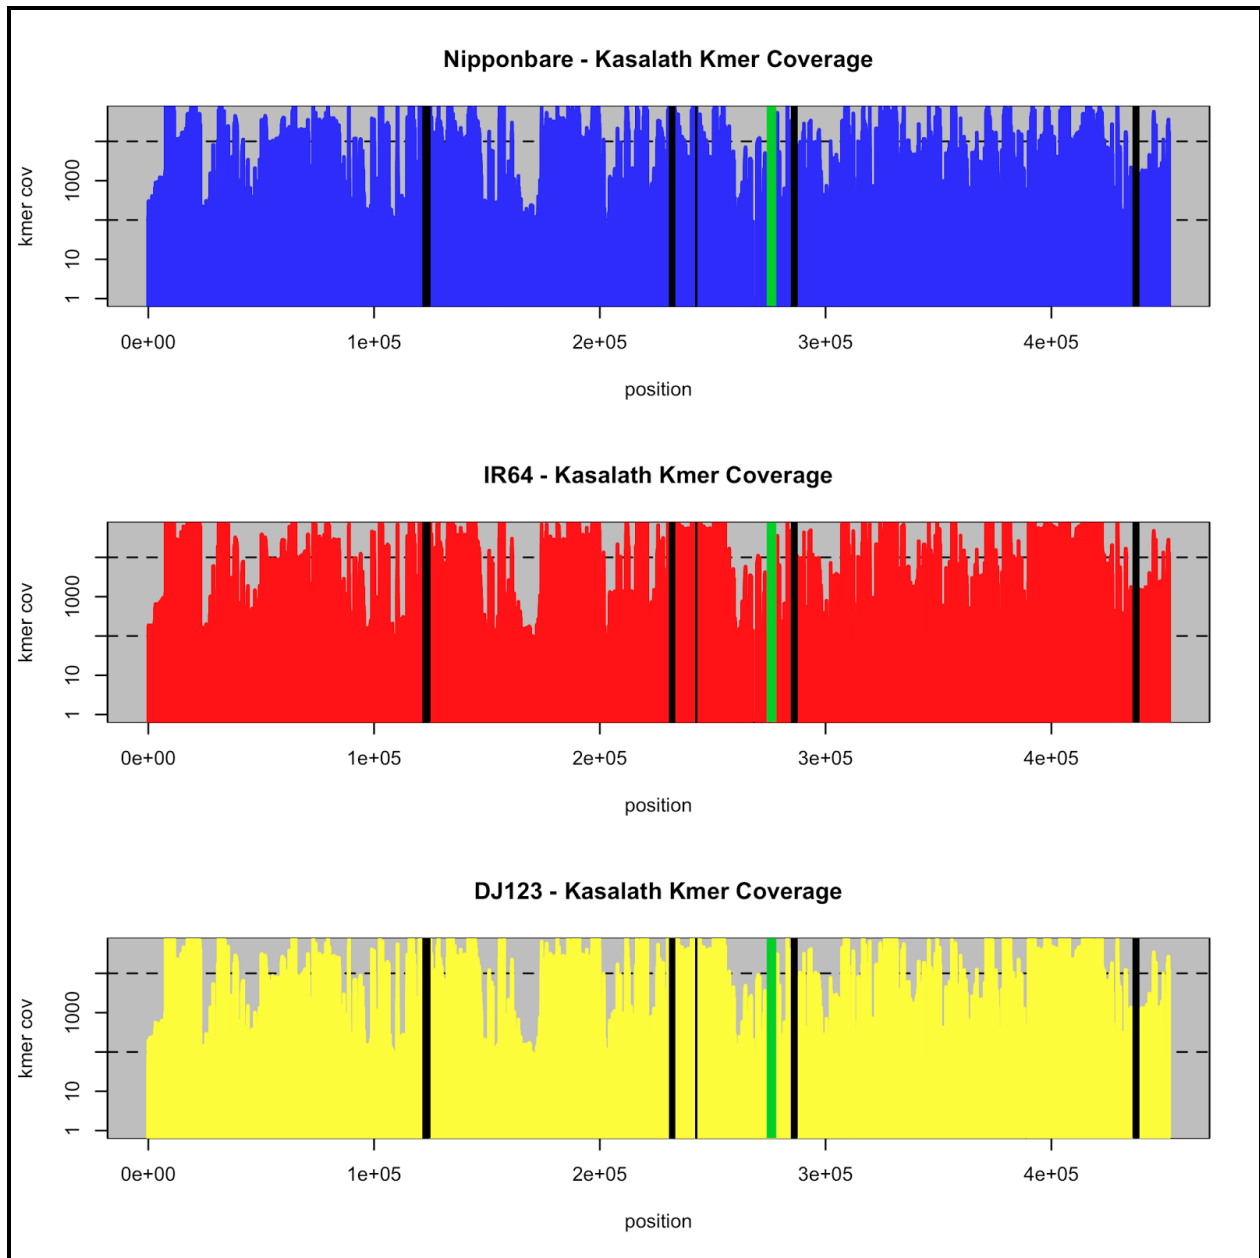

**Supplementary Figure 10. K-mer coverage across the entire Pup1 region in Kasalath**

The k-mer coverage is plotted with respect to the reference Kasalath sequence (AB458444.1) The total sequence span is 452 kbp. For clarity, the range 1x to 50,000x (log scale) is displayed in all the plots. Black vertical lines indicate gaps (Ns) in the reference sequence. The position of the *PstII* gene is highlighted in green. See Supplementary Figure 9 for just the coverage of *PstII*.

|                     |                                                                                 |    |    |    |    |    |    |    |    |    |     |     |
|---------------------|---------------------------------------------------------------------------------|----|----|----|----|----|----|----|----|----|-----|-----|
|                     | 1                                                                               | 10 | 20 | 30 | 40 | 50 | 60 | 70 | 80 | 90 | 100 | 109 |
| AB458444            | ACCTGATAGATATTCCTTTGGCCGATAGCTCTGTCCAAGGAGATAACACCCCTGAGCTGGATAGACTGTTCAATATTA  |    |    |    |    |    |    |    |    |    |     |     |
| Kasalath (Sanger)   | ACCTGATAGATATTCCTTTGGCCGATAGCTCTGTCCAAGGAGATAACACCCCTGAGCTGGATAGACTGTTCAATATTA  |    |    |    |    |    |    |    |    |    |     |     |
| DJ123-scaffold_1192 | ACCTGATAGATATTCCTTTGGCCGATAGCTCTGTCCAAGGAGATAACACCCCTGAGCTGGATAGACTGTTCAATATTA  |    |    |    |    |    |    |    |    |    |     |     |
| DJ123 (Sanger)      | ACCTGATAGATATTCCTTTGGCCGATAGCTCTGTCCAAGGAGATAACACCCCTGAGCTGGATAGACTGTTCAATATTA* |    |    |    |    |    |    |    |    |    |     |     |

**Supplementary Figure 11. Multiple alignment of *Pst*II sequence fragment.**

In particular, the SNP that introduces a premature stop codon in the DJ123 allele (red asterisk) was confirmed with Sanger sequencing.
